# Supplementary material for: POE Immunoassay: Plate-based oligonucleotide electro-chemiluminescent immunoassay for the quantification of nucleic acids in biological matrices
Source: PubMed Central journal article supplement (PMC7319975; doi:10.1038/s41598-020-66829-6), 2020-06-26
Supplement: 41598_2020_66829_MOESM1_ESM.pdf [file 41598_2020_66829_MOESM1_ESM.pdf]

## Supplemental Information

POE Immunoassay: Plate-based oligonucleotide electro-chemiluminescent immunoassay for the quantification of nucleic acids in biological matrixes.

Mai B. Thayer<sup>1</sup>, Sara C. Humphreys<sup>1</sup>, Julie M. Lade<sup>1</sup>, Kyu S. Chung<sup>1</sup>, and Brooke Rock<sup>1\*</sup>

<sup>1</sup> Amgen Research, Pharmacokinetics & Drug Metabolism, Amgen Inc., South San Francisco, CA

\* To whom correspondence should be addressed.

\*Brooke M. Rock, Tel: 650 244-2845, Email: [brooke@amgen.com](mailto:brooke@amgen.com).

x.siRNA Serum Sensitivity in Multiple Species

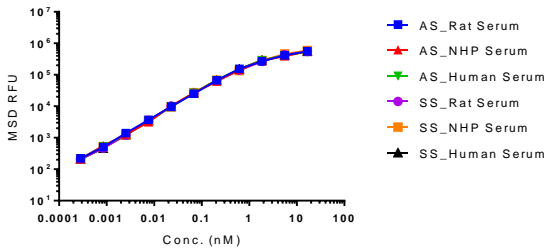

y.siRNA Serum Sensitivity in Multiple Species

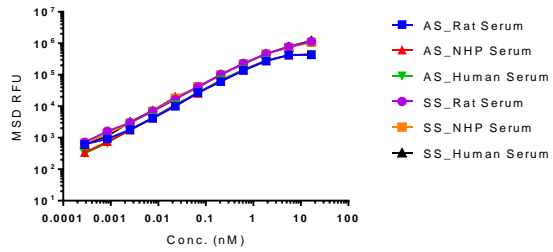

z.siRNA Serum Sensitivity in Multiple Species

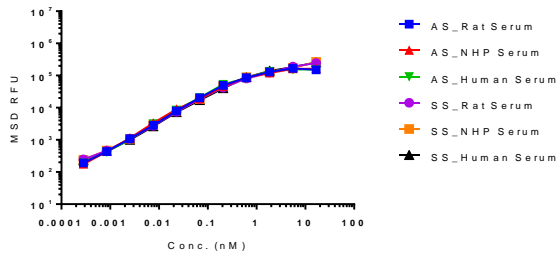

HPRT.siRNA Serum Sensitivity in Multiple Species

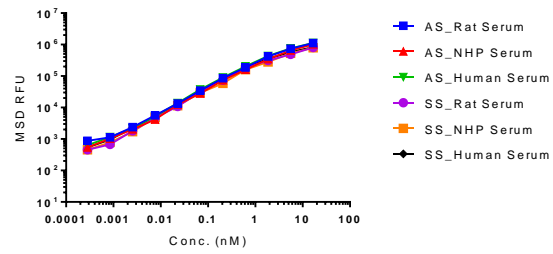

**Supplemental Figure 1.** Sensitivity of siRNA constructs in Sprague Dawley, non-human primate (NHP), and human serum. Sense and antisense strands detected independently with the POE immunoassay.

|                                                       | Parent | 3' n-1 | 3' n-2 | 3' n-3 | 5' n-1 | 5' n-2 | 5' n-3 | n-2  | n-4  | n-6 |
|-------------------------------------------------------|--------|--------|--------|--------|--------|--------|--------|------|------|-----|
| <b>%Reactivity from parent (calculated from EC50)</b> | 100    | 99.8   | 70.3   | 67.7   | 60.2   | 65.2   | 18.4   | 96.5 | 73.0 | 0   |

**Supplemental Table 1.** Selectivity of z.siRNA POE immunoassay probes to synthetic metabolites. EC50 calculated with a 4-parameter fit with fixed weighting in GraphPad Prism Software 7.02 (La Jolla, CA). N-x(metabolites) signify an exclusion from both ends of the siRNA strand. For example n-2 corresponds to one base removed from both the 5' and 3' ends.

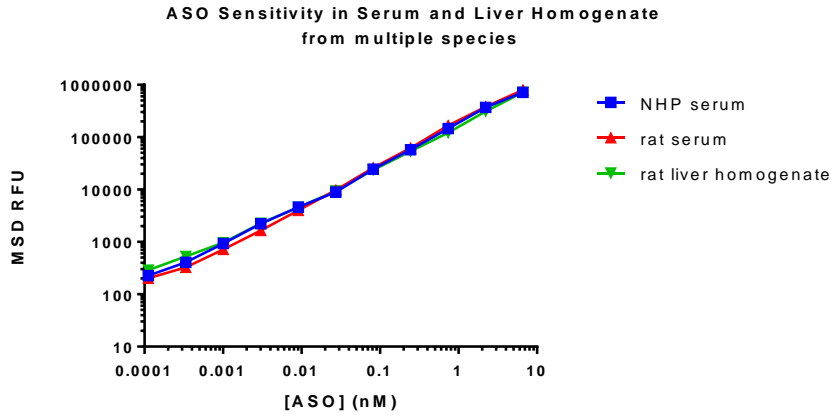

**Supplemental Figure 2.** Sensitivity of ASO construct in NHP serum and Sprague Dawley serum and liver tissue homogenate.

| Calibration Curve Parameters for HPRT.siRNA Calibration Standards in Rat Serum, analysis of antisense strand<br>(Study POE Immunoassay MSD assay qualification) |              |         |         |       |      |           |         |         |                        |
|-----------------------------------------------------------------------------------------------------------------------------------------------------------------|--------------|---------|---------|-------|------|-----------|---------|---------|------------------------|
| Run Date                                                                                                                                                        | Curve Number | Min     | Max     | Slope | Ed50 | R-Squared | LLOQ    | ULOQ    | Regression Footnote(s) |
| Day1                                                                                                                                                            | 1            | 498     | 764000  | 1.01  | 1140 | 0.9985    | 4.00000 | 2500.00 | 1                      |
| Day2                                                                                                                                                            | 2            | -119    | 1360000 | 0.949 | 1690 | 0.9994    | 4.00000 | 2500.00 | 1                      |
| Day2                                                                                                                                                            | 3            | 690     | 1980000 | 0.976 | 1610 | 0.9989    | 4.00000 | 2500.00 | 1                      |
| Day3                                                                                                                                                            | 4            | 211     | 894000  | 0.978 | 1090 | 0.9992    | 4.00000 | 2500.00 | 1                      |
| Day3                                                                                                                                                            | 5            | 325     | 1440000 | 0.971 | 1790 | 0.9982    | 4.00000 | 2500.00 | 1                      |
| Day4                                                                                                                                                            | 6            | 401     | 789000  | 0.963 | 988  | 0.9980    | 4.00000 | 2500.00 | 1                      |
| Day4                                                                                                                                                            | 11           | 455     | 1050000 | 0.981 | 893  | 0.9977    | 4.00000 | 2500.00 | 1                      |
| Day5                                                                                                                                                            | 12           | 435     | 1180000 | 0.983 | 1070 | 0.9977    | 4.00000 | 2500.00 | 1                      |
| Day5                                                                                                                                                            | 13           | -160    | 1220000 | 0.948 | 1320 | 0.9986    | 4.00000 | 2500.00 | 1                      |
| Day6                                                                                                                                                            | 21           | 697     | 1700000 | 1.00  | 962  | 0.9984    | 4.00000 | 2500.00 | 1                      |
| Mean                                                                                                                                                            |              | 343     | 1237700 | 0.976 | 1255 | 0.9985    |         |         |                        |
| S.D.                                                                                                                                                            |              | 294.075 | 394876  | 0.02  | 328  | 0.00059   |         |         |                        |
| %CV                                                                                                                                                             |              | 85.6613 | 31.904  | 2.026 | 26.1 | 0.05863   |         |         |                        |
| n                                                                                                                                                               |              | 10      | 10      | 10    | 10   | 10        |         |         |                        |
| Regression Footnote(s):                                                                                                                                         |              |         |         |       |      |           |         |         |                        |
| 1) Resp. = (Min - Max) / (1 + (Conc. / Ed50) ** Slope) + Max                                                                                                    |              |         |         |       |      |           |         |         |                        |

**Supplemental Table 2.** Calibration curve parameters for the qualification runs of the antisense strand of HPRT.siRNA in Sprague Dawley

| Calibration Curve Parameters for HPRT.siRNA Calibration Standards in Rat Liver Homogenate, analysis of antisense strand<br>(Study POE Immunoassay MSD assay qualification) |              |       |         |       |      |           |         |         |                        |
|----------------------------------------------------------------------------------------------------------------------------------------------------------------------------|--------------|-------|---------|-------|------|-----------|---------|---------|------------------------|
| Run Date                                                                                                                                                                   | Curve Number | Min   | Max     | Slope | Ed50 | R-Squared | LLOQ    | ULOQ    | Regression Footnote(s) |
| Day1                                                                                                                                                                       | 15           | -696  | 975000  | 0.902 | 1480 | 0.9969    | 4.00000 | 2500.00 | 1                      |
| Day1                                                                                                                                                                       | 16           | -88.7 | 892000  | 0.909 | 1390 | 0.9972    | 4.00000 | 2500.00 | 1                      |
| Day1                                                                                                                                                                       | 17           | -228  | 1600000 | 1.01  | 1510 | 0.9962    | 4.00000 | 2500.00 | 1                      |
| Day1                                                                                                                                                                       | 18           | -2.66 | 1910000 | 0.941 | 1710 | 0.9985    | 4.00000 | 2500.00 | 1                      |
| Day1                                                                                                                                                                       | 19           | 1010  | 1820000 | 0.976 | 918  | 0.9982    | 4.00000 | 2500.00 | 1                      |
| Day1                                                                                                                                                                       | 20           | 1730  | 1820000 | 0.979 | 1230 | 0.9974    | 4.00000 | 2500.00 | 1                      |
| Day2                                                                                                                                                                       | 22           | 607   | 1800000 | 0.988 | 1180 | 0.9992    | 4.00000 | 2500.00 | 1                      |
| Day3                                                                                                                                                                       | 24           | 475   | 1390000 | 1.01  | 836  | 0.9992    | 4.00000 | 2500.00 | 1                      |
| Day3                                                                                                                                                                       | 27           | 501   | 1680000 | 1.02  | 1230 | 0.9996    | 4.00000 | 2500.00 | 1                      |
| Mean                                                                                                                                                                       |              | 368   | 1543000 | 1     | 1276 | 1         |         |         |                        |
| S.D.                                                                                                                                                                       |              | 723   | 378492  | 0.044 | 281  | 0.00118   |         |         |                        |
| %CV                                                                                                                                                                        |              | 197   | 24.5296 | 4.509 | 22   | 0.11835   |         |         |                        |
| n                                                                                                                                                                          |              | 9     | 9       | 9     | 9    | 9         |         |         |                        |
| Regression Footnote(s):                                                                                                                                                    |              |       |         |       |      |           |         |         |                        |
| 1) Resp. = (Min - Max) / (1 + (Conc. / Ed50) ** Slope) + Max                                                                                                               |              |       |         |       |      |           |         |         |                        |

**Supplemental Table 3.** Calibration curve parameters for the qualification runs of the antisense strand of HPRT.siRNA in Sprague Dawley liver tissue homogenate.

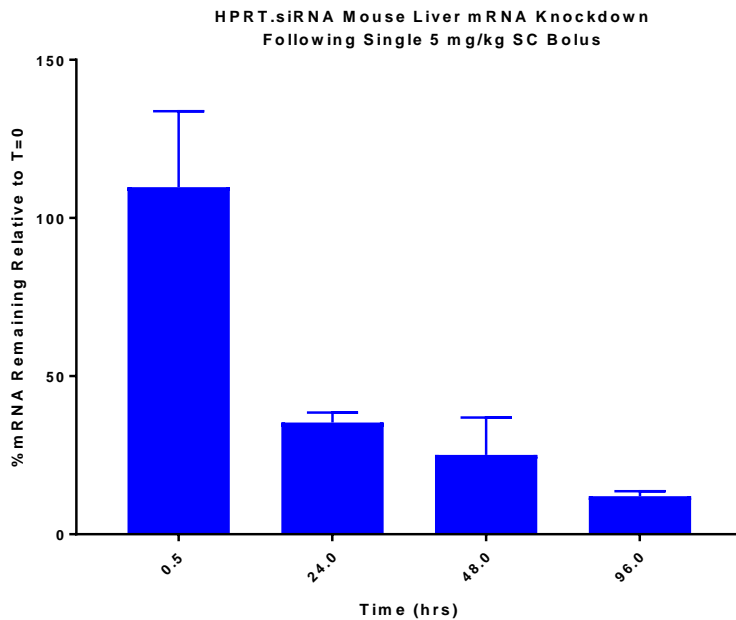

**Supplemental Figure 3.** Efficacy of HPRT.siRNA demonstrated as percentage of knockdown relative to T=0 liver samples in mouse liver samples. In short, samples were homogenized, and RNA extracted using a MagMax™-96 Total RNA Isolation Kit (Thermofisher, AM1830). Reverse transcript was generated using AccuScript High Fidelity RT-PCR System (Agilent, 600180 and samples were analyzed by on a Digital Droplet PCR system (BioRad, USA) using TaqMan Primer Probe FAM/HEX probes: Mouse HPRT TaqMan FAM-MGB (Thermofisher, 4331182) and mouse TBP TaqMan VIC-MGB (Thermofisher, 4448489). Results normalized to TBP housekeeping gene.
